# Supplementary material for: Characteristic fingerprint spectrum of neurotransmitter norepinephrine with broadband terahertz time-domain spectroscopy
Source: Royal Society of Chemistry journal article supplement (doi:10.1039/c8an02079e), 2018-12-20
Supplement: c8an02079e1.pdf [file c8an02079e1.pdf]

# Characteristic Fingerprint Spectrum of Neurotransmitter Norepinephrine with Broadband Terahertz Time-Domain Spectroscopy

Zhongjie Zhu<sup>a,b</sup>, Chao Cheng<sup>a,c</sup>, Chao Chang<sup>d,\*</sup>, Guanhua Ren<sup>a,e</sup>, Jianbing Zhang<sup>a,c</sup>, Yan Peng<sup>f</sup>, Jianguang Han<sup>e</sup>, Hongwei Zhao<sup>a,c,\*</sup>

a Division of Interfacial Water and Key Laboratory of Interfacial Physics and Technology, Shanghai Institute of Applied Physics, Chinese Academy of Sciences, Shanghai 201800, China

b University of Chinese Academy of Sciences, Beijing 100049, China

c Shanghai Advanced Research Institute, Chinese Academy of Sciences, No.99 Haik Road, Zhangjiang Hi-Tech Park, Pudong Shanghai, Shanghai 201210, China

d Advanced Interdisciplinary Technology Research Center, National Innovation Institute of Defense Technology, Beijing 100071, China

e Center for Terahertz Waves and College of Precision Instrument and Optoelectronics Engineering, and Key Laboratory of Optoelectronics Information and Technology, Ministry of Education, Tianjin University, Tianjin 300072, China

f Shanghai Key Lab of Modern Optical System, University of Shanghai for Science and Technology No.516, Jungong Road, Shanghai 200093, China

\* E-mail address: [zhaohongwei@sinap.ac.cn](mailto:zhaohongwei@sinap.ac.cn).

\* E-mail address: [changc@xjtu.edu.cn](mailto:changc@xjtu.edu.cn).

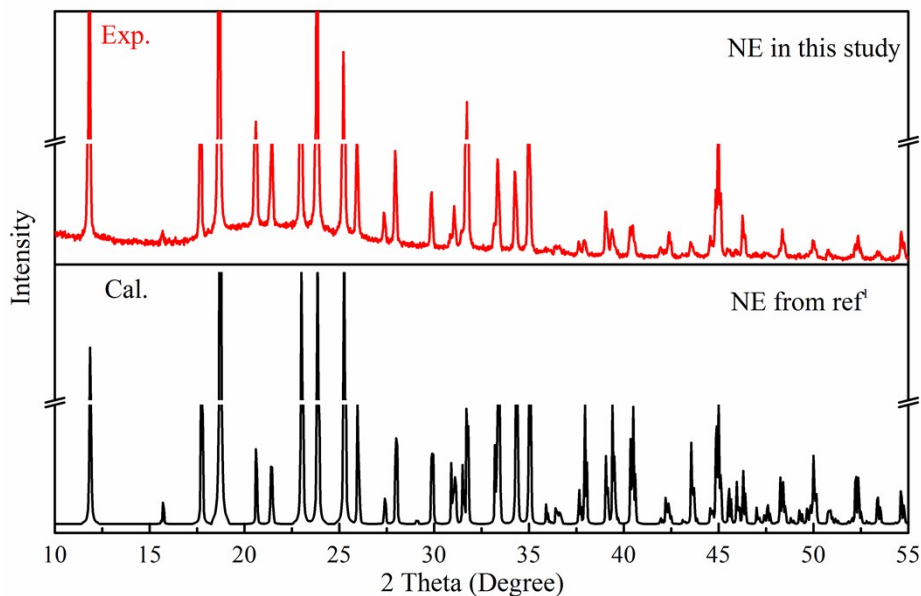

Fig. S1 The experimental and simulated PXRD patterns of NE.

As shown in Fig. S1, PXRD was carried out to check the crystal structure of NE sample. And the result manifests that the experimental PXRD pattern of NE agrees well with the calculated pattern from the ref.<sup>1</sup>

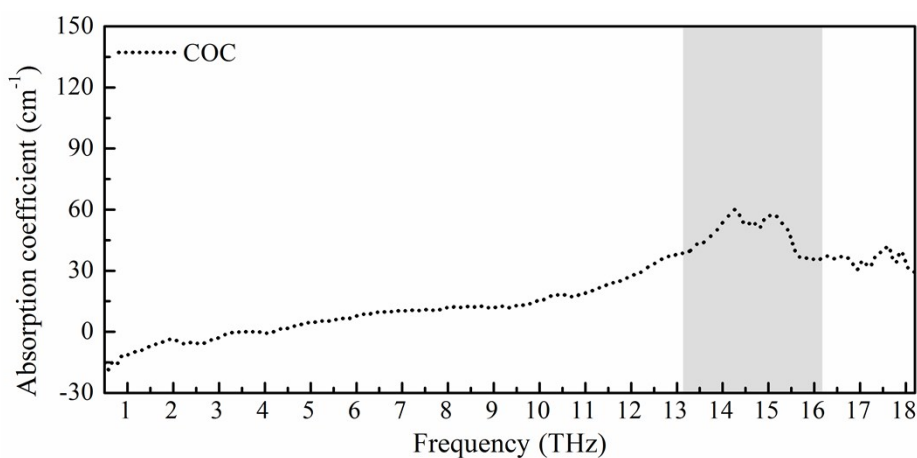

Fig. S2 The broadband THz absorption spectrum of COC between 0.5 and 18.2 THz.

Fig. S2 shows the THz spectrum of COC obtained by the broadband air-plasma THz system.

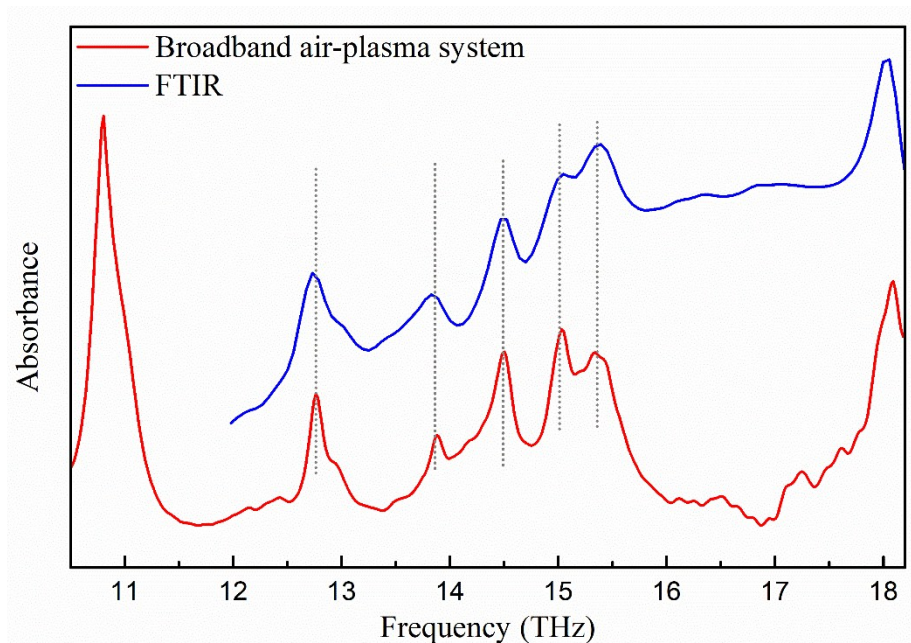

Fig. S3 The comparison of the NE spectra obtained by the broadband air-plasma THz system (red) and FTIR (blue).

Fig. S3 shows the THz spectrum of NE from 10.5 to 18.2 THz obtained by the broadband air-plasma THz system (COC as substrate) and the FTIR spectrum of NE from 12 to 18.2 THz (KBr as substrate). We can see that the spectra from the broadband air-plasma THz system and FTIR in the 12-18.2 THz region covered by both systems are consistent.

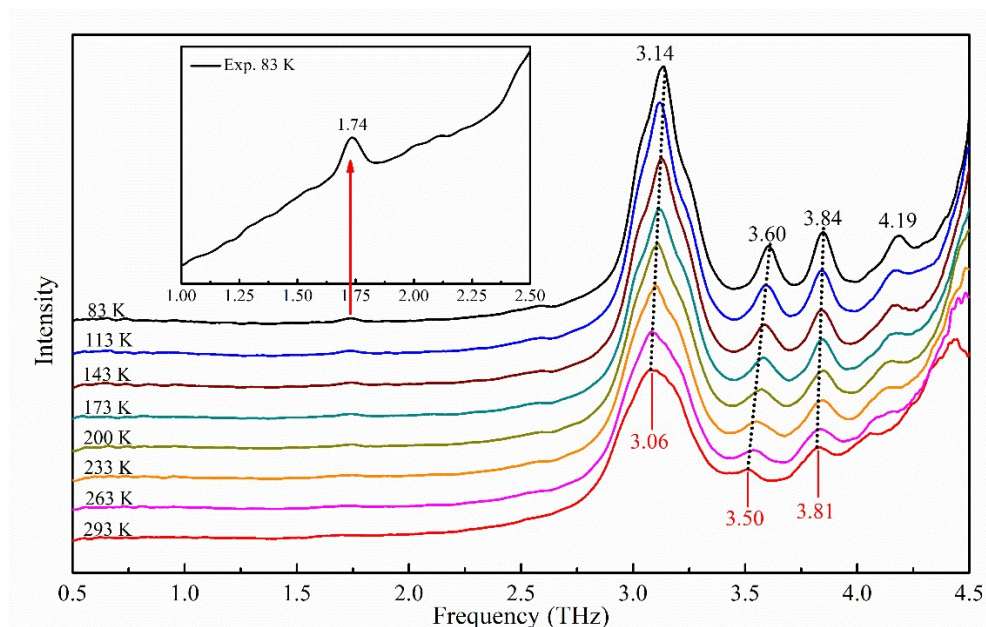

Fig. S4 The temperature effect on the absorption spectra of NE. (The inset shows the absorption peak at 1.74 THz)

Eight spectra were picked at regular intervals and were presented in Fig. S4. As the

temperature was reduced the absorption peaks become sharper and more obvious.

#### **Supporting reference**

- (1) A. Andersen, *Acta Chemica Scandinavica B*, 1975, **29**, 871-876.
